# Supplementary material for: The recurrent campylobacteriosis epidemic over Christmas and New Year in European countries, 2006–2014
Source: PubMed Central journal article supplement (PMC5504853; doi:10.1186/s13104-017-2587-8), 2017-07-11
Supplement: 13104_2017_2587_MOESM1_ESM.pdf [file 13104_2017_2587_MOESM1_ESM.pdf]

Additional file 1

**The recurrent campylobacteriosis epidemic over Christmas and New Year in European countries, 2006–2014**

*BMC Research Notes*

Philipp Justus Bless<sup>1,2</sup>, Claudia Schmutz<sup>1,2</sup>, Daniel Mäusezahl<sup>1,2\*</sup>

<sup>1</sup>Swiss Tropical and Public Health Institute, Socinstrasse 57, P. O. Box, 4002 Basel, Switzerland

<sup>2</sup>University of Basel, Petersplatz 1, P. O. Box, 4001 Basel, Switzerland

\*corresponding author ([daniel.maeusezahl@unibas.ch](mailto:daniel.maeusezahl@unibas.ch))

# Austria

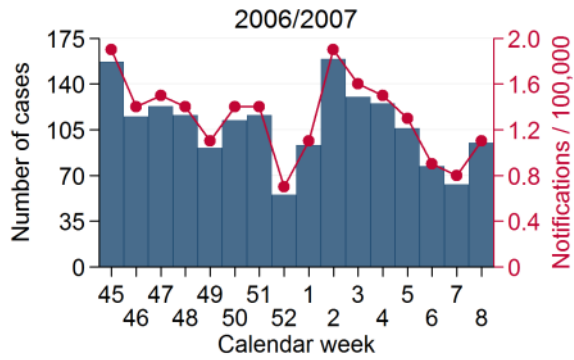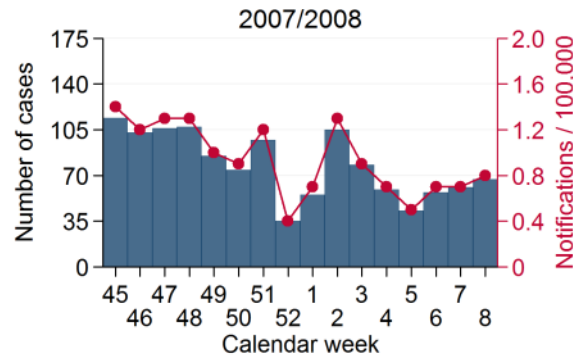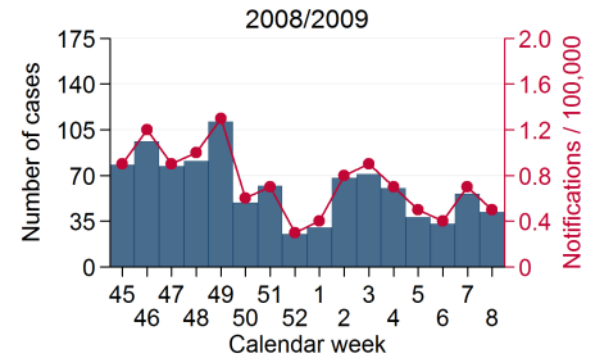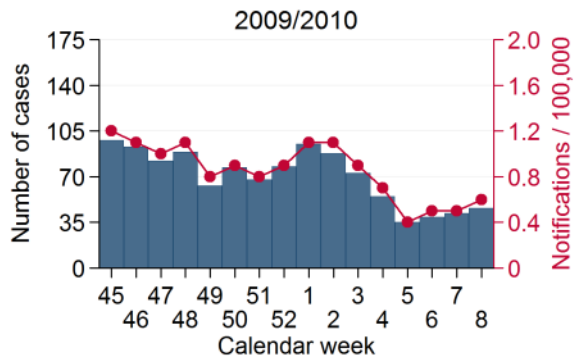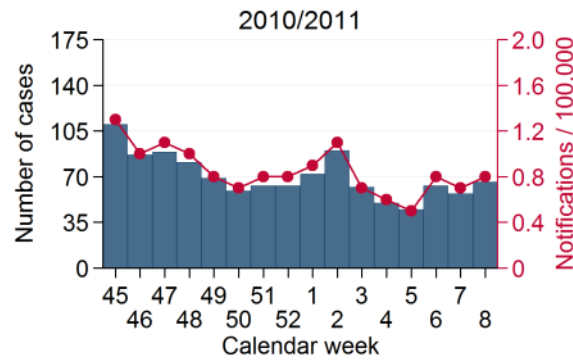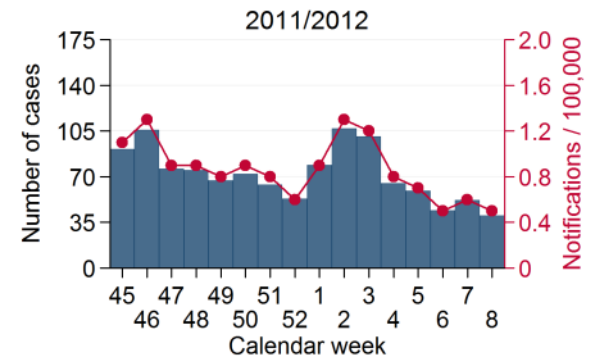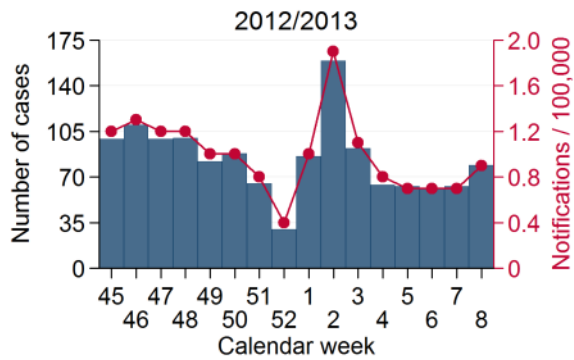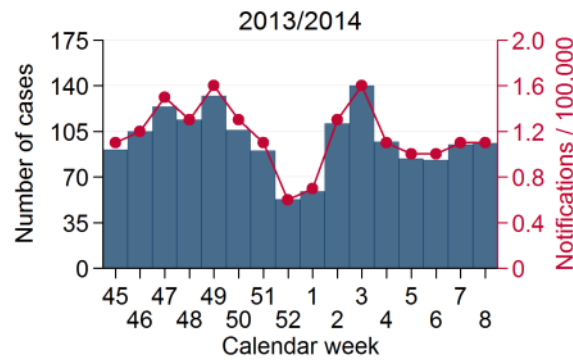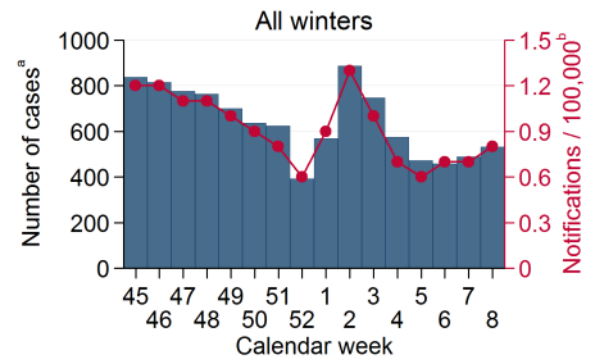

<sup>a</sup>Sum of weekly notifications from winter seasons 2006/2007 to 2013/2014

<sup>b</sup>Weekly notifications per 100,000 population = median of weekly notification rates from winter seasons 2006/2007 to 2013/2014

# Belgium

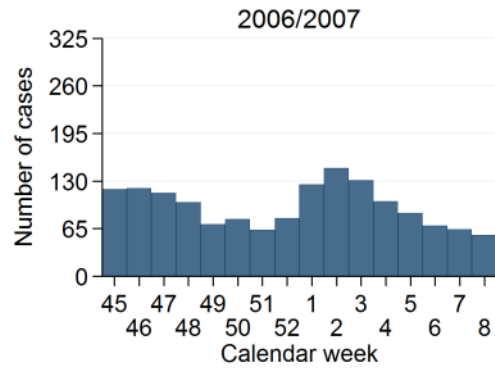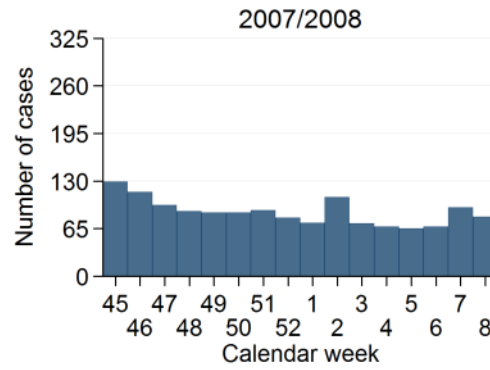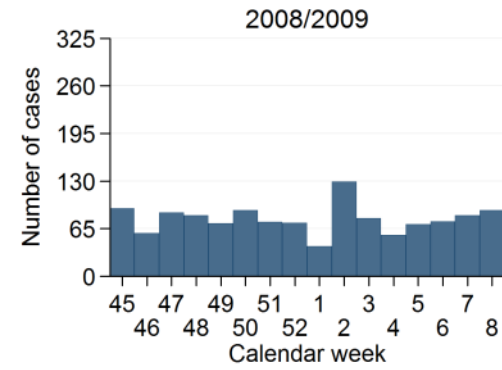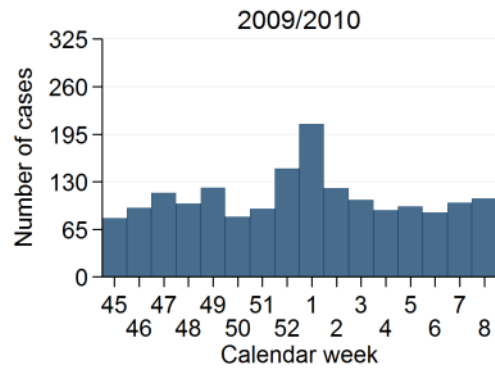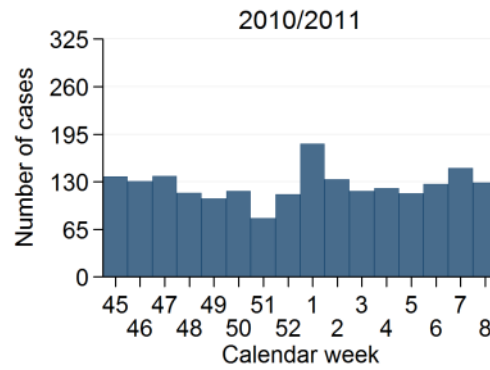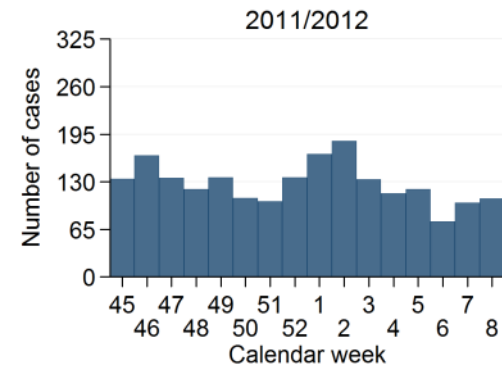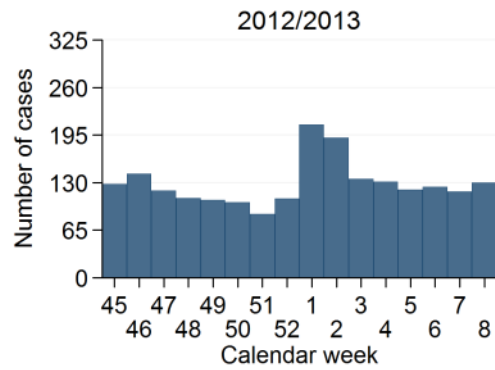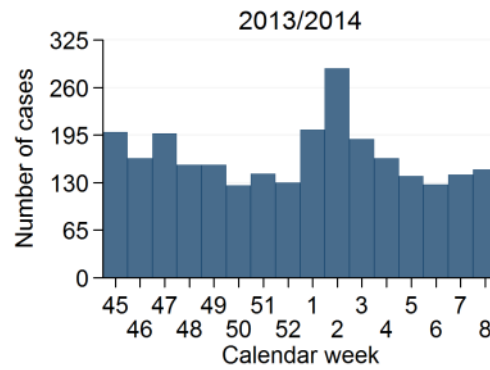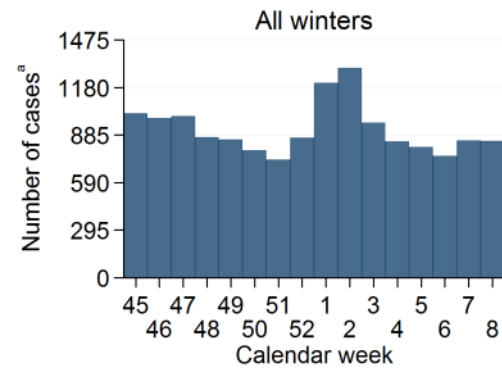

<sup>a</sup>Sum of weekly notifications from winter seasons 2006/2007 to 2013/2014

# Denmark

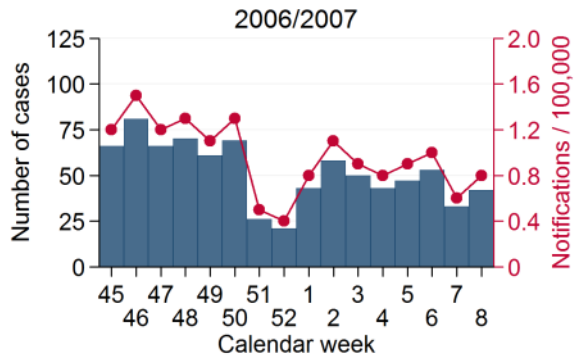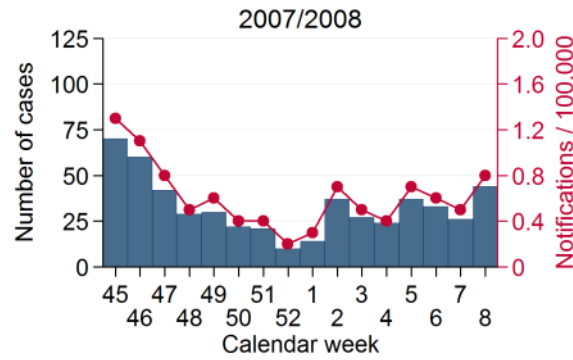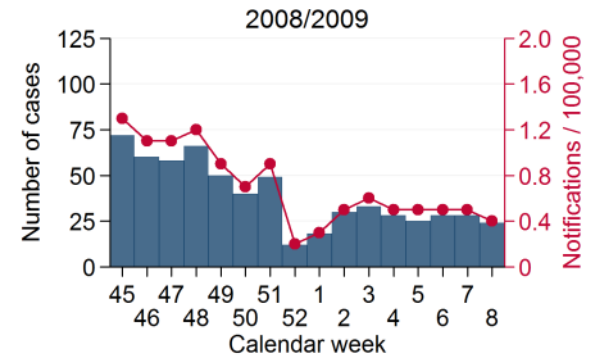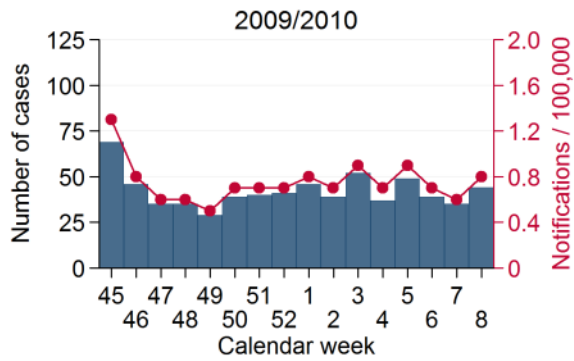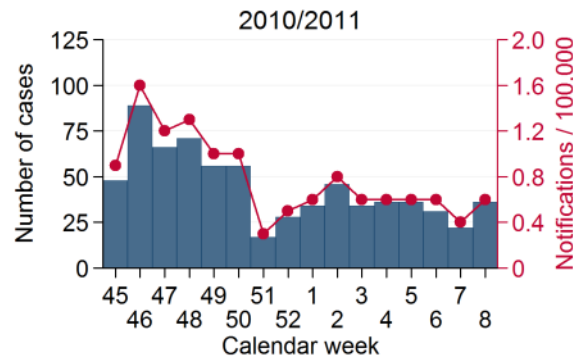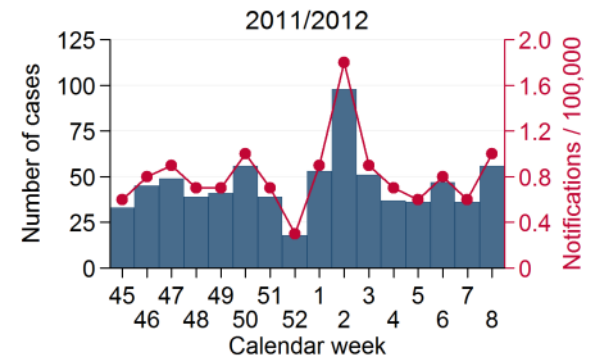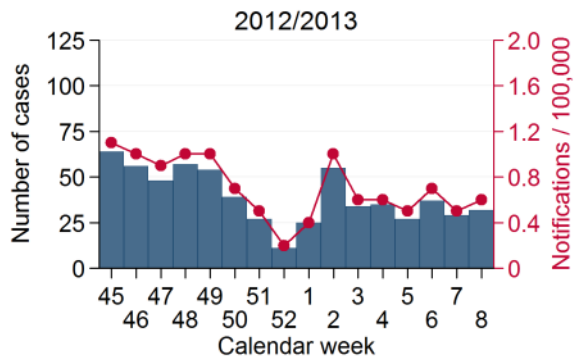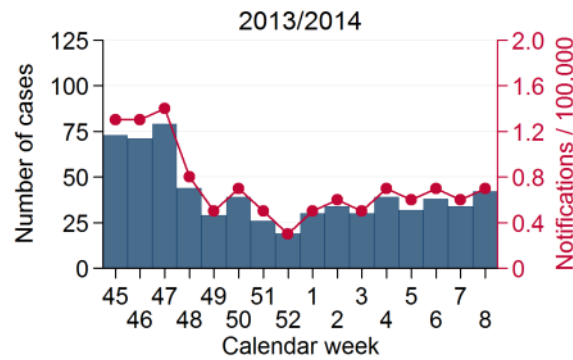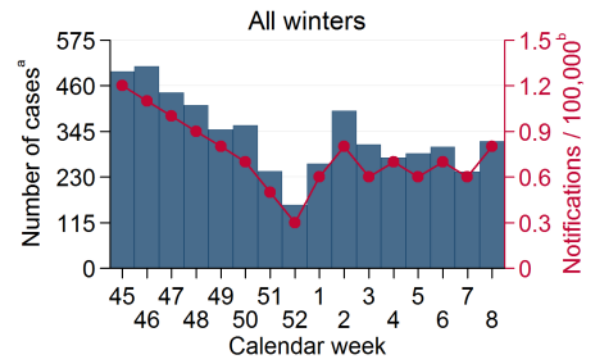

<sup>a</sup> Sum of weekly notifications from winter seasons 2006/2007 to 2013/2014

<sup>b</sup> Weekly notifications per 100,000 population = median of weekly notification rates from winter seasons 2006/2007 to 2013/2014

# Finland

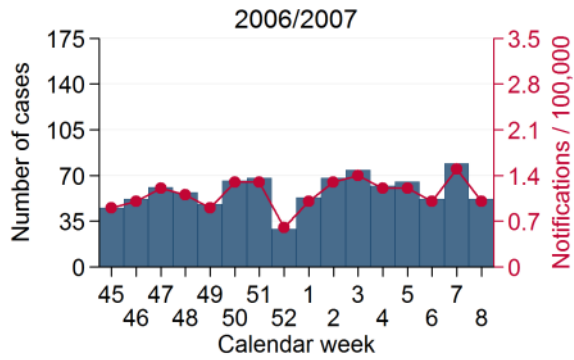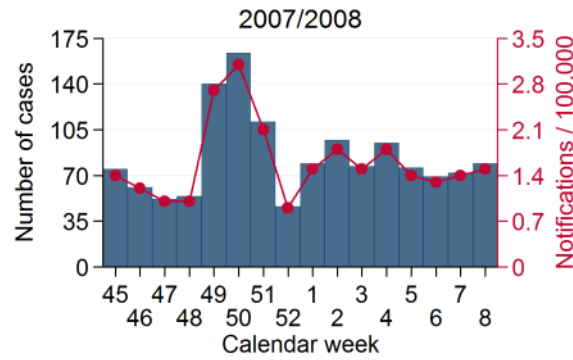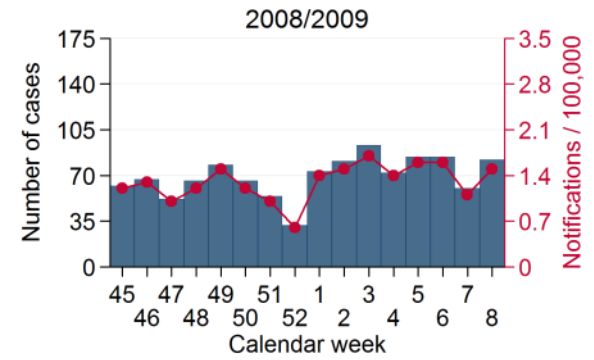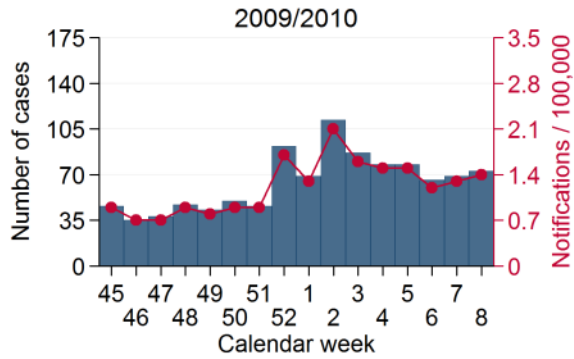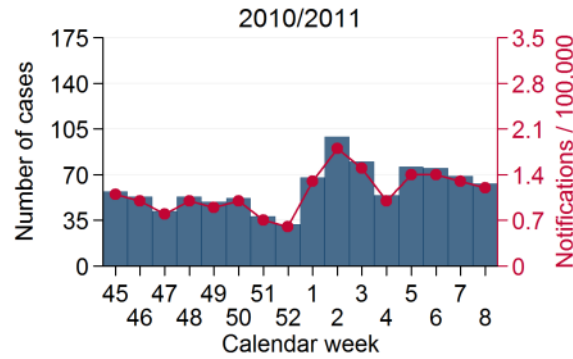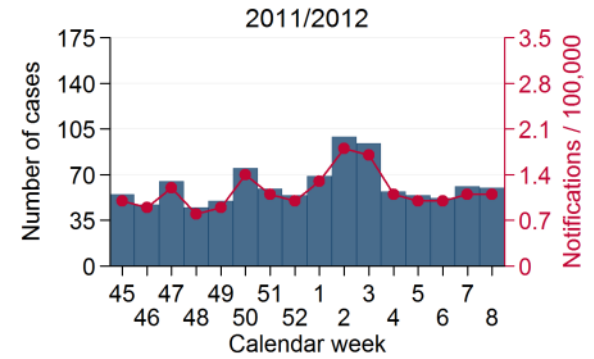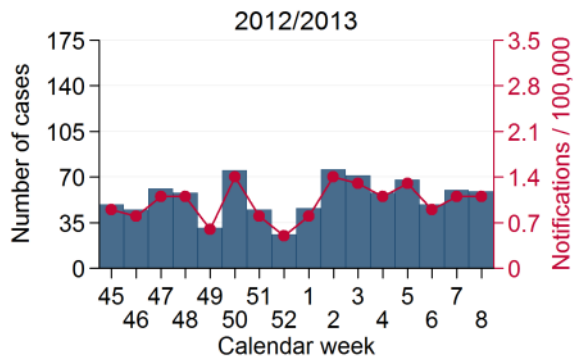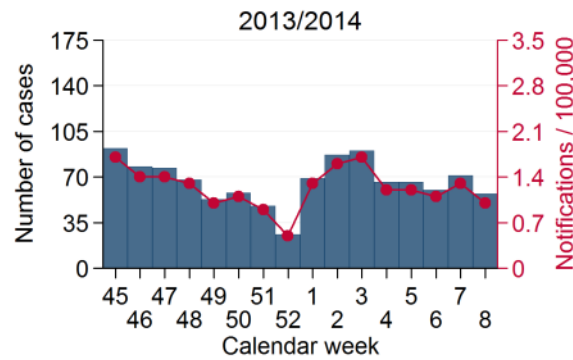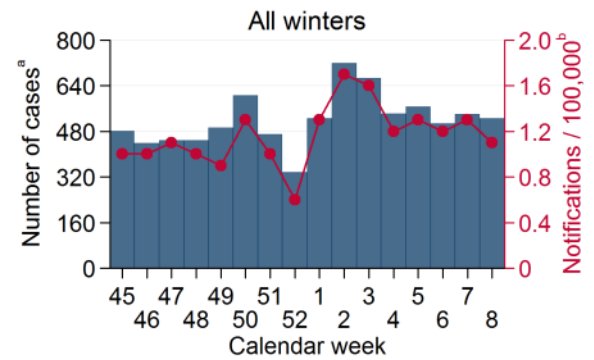

<sup>a</sup> Sum of weekly notifications from winter seasons 2006/2007 to 2013/2014

<sup>b</sup> Weekly notifications per 100,000 population = median of weekly notification rates from winter seasons 2006/2007 to 2013/2014

# France

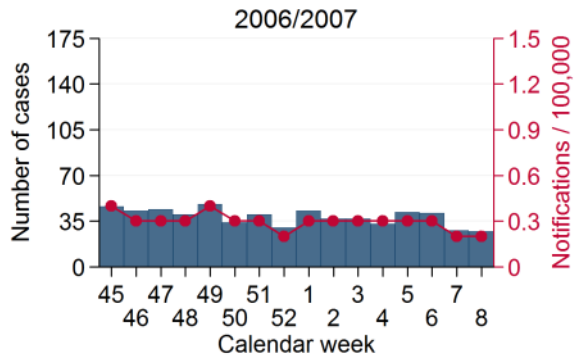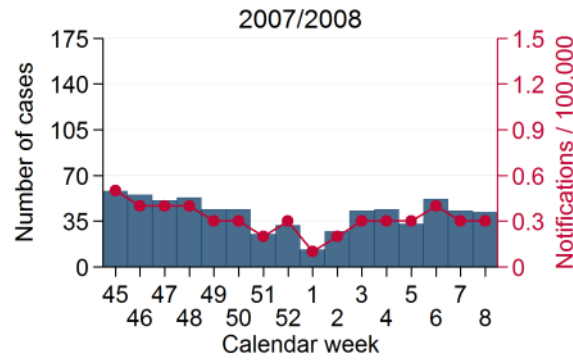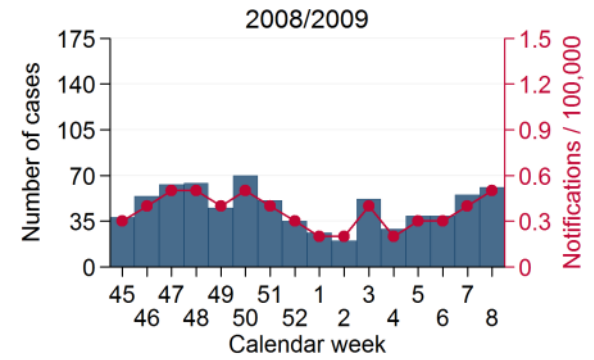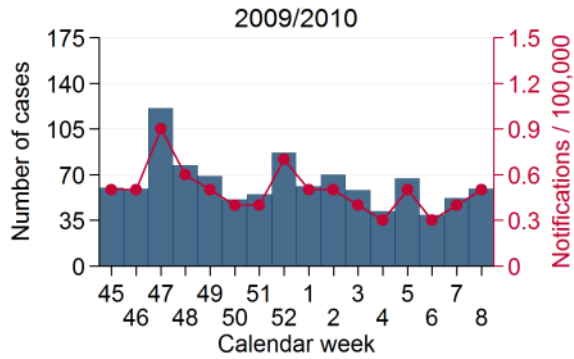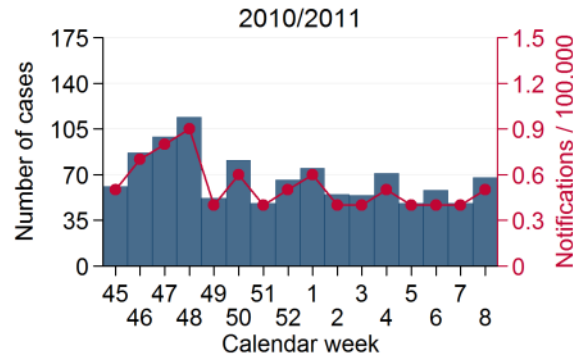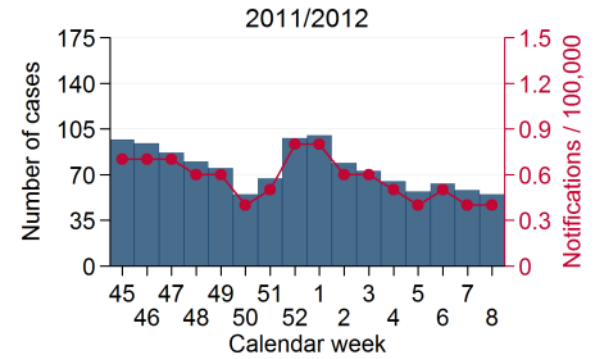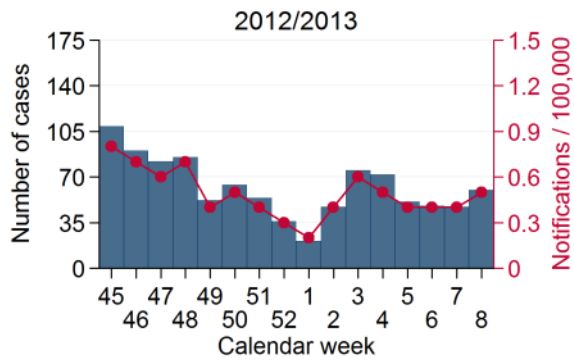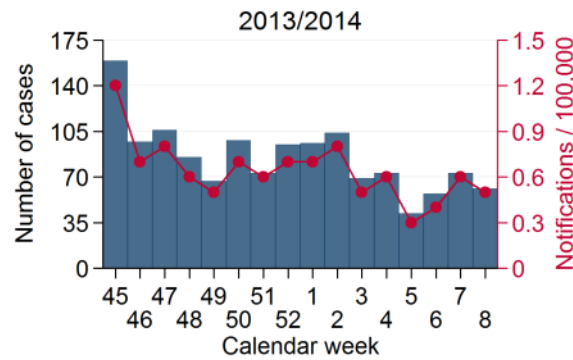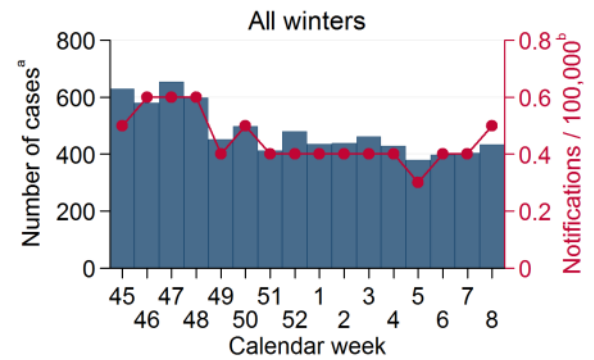

<sup>a</sup> Sum of weekly notifications from winter seasons 2006/2007 to 2013/2014

<sup>b</sup> Weekly notifications per 100,000 population = median of weekly notification rates from winter seasons 2006/2007 to 2013/2014



# Germany

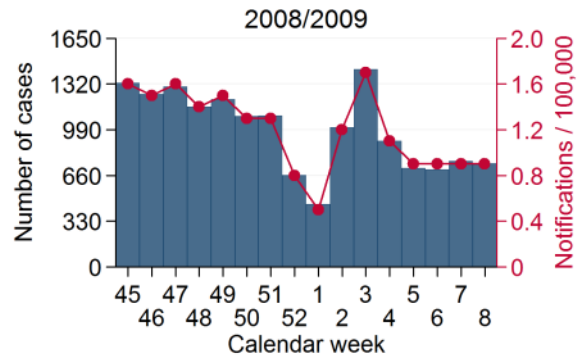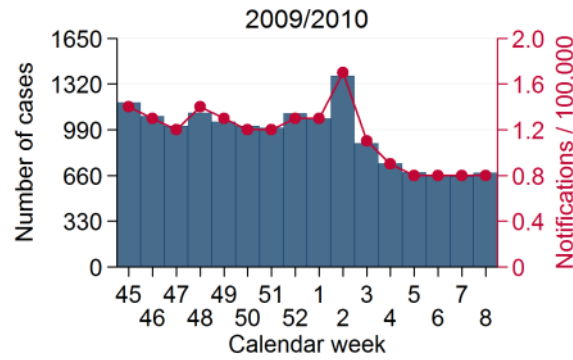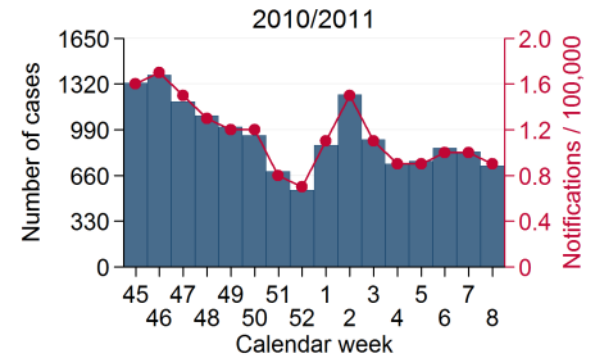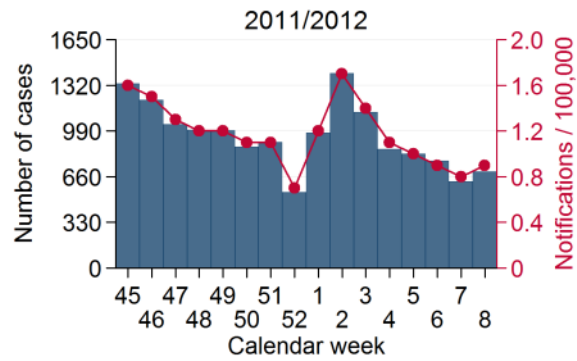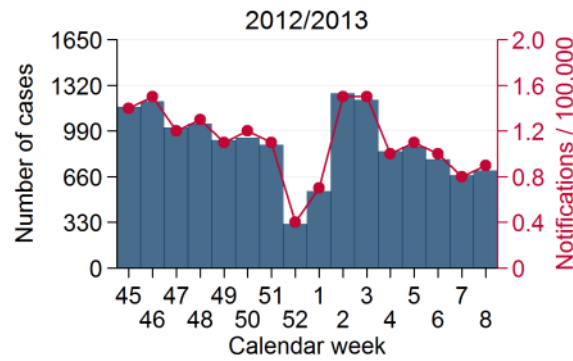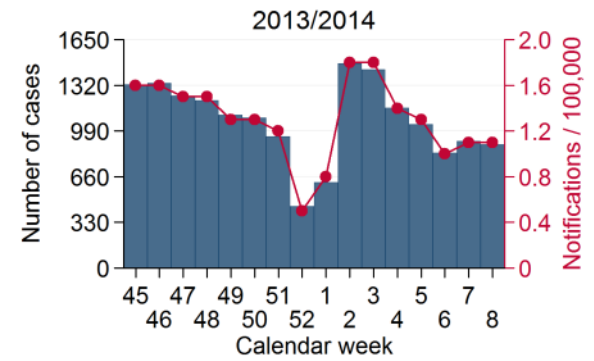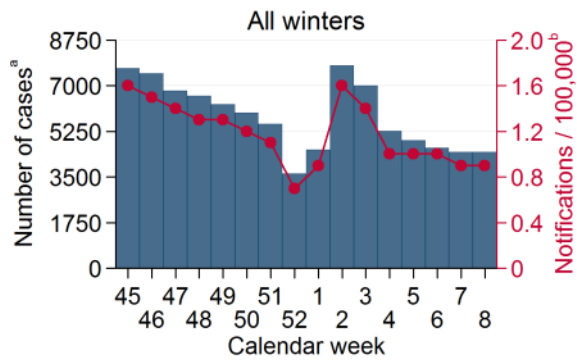

<sup>a</sup> Sum of weekly notifications from winter seasons 2008/2009 to 2013/2014

<sup>b</sup> Weekly notifications per 100,000 population = median of weekly notification rates from winter seasons 2008/2009 to 2013/2014

# Ireland

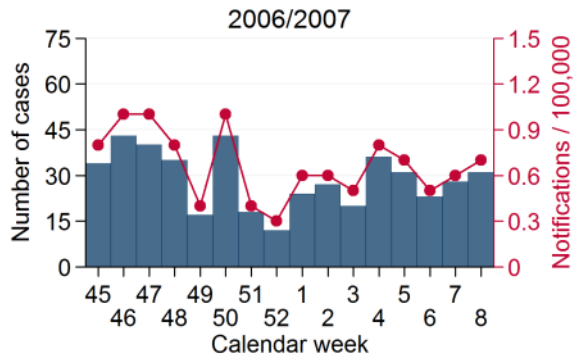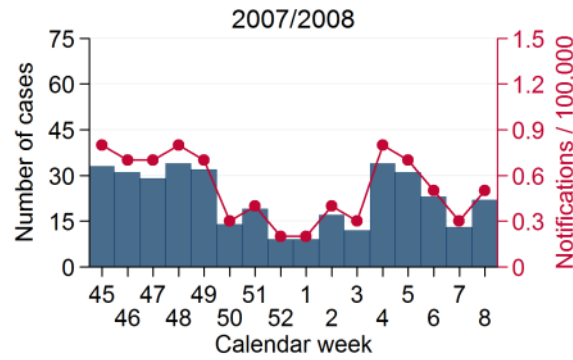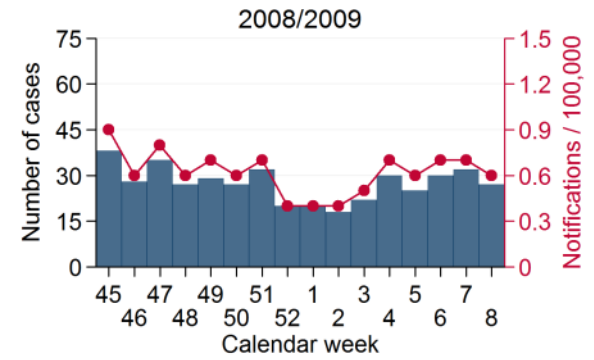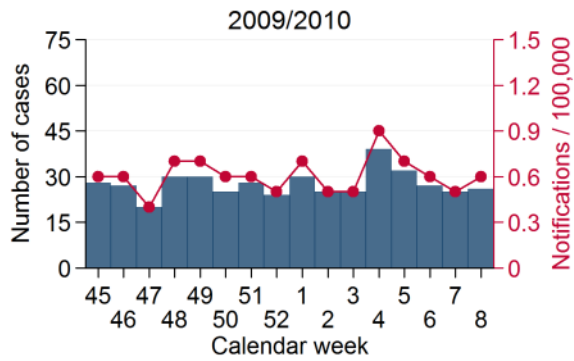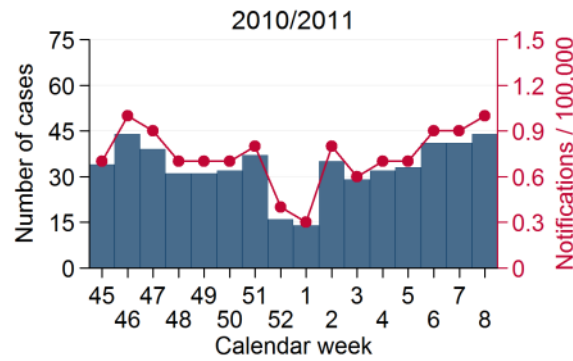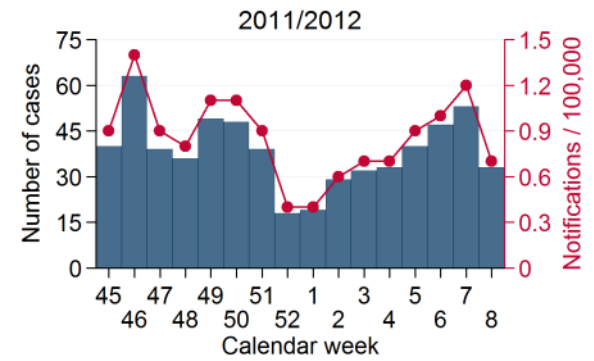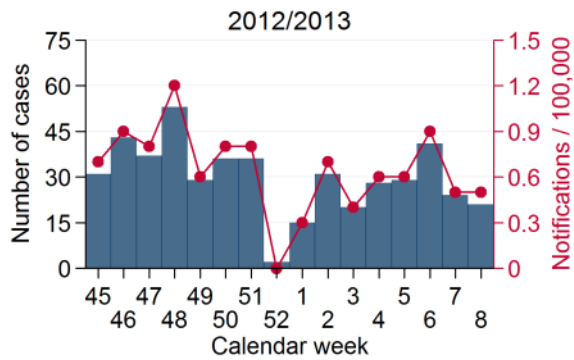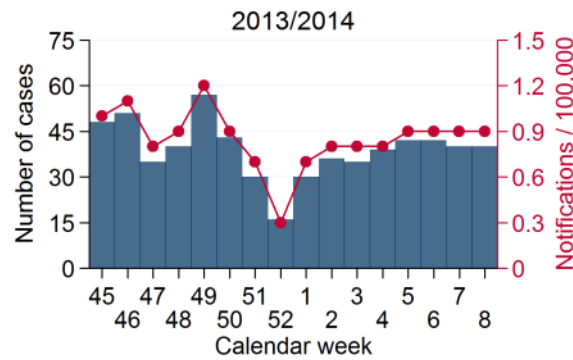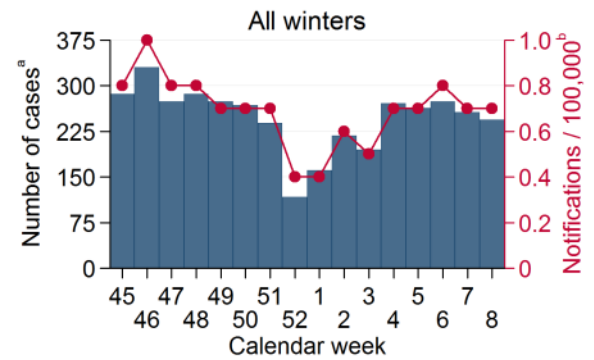

<sup>a</sup>Sum of weekly notifications from winter seasons 2006/2007 to 2013/2014

<sup>b</sup>Weekly notifications per 100,000 population = median of weekly notification rates from winter seasons 2006/2007 to 2013/2014



# Italy

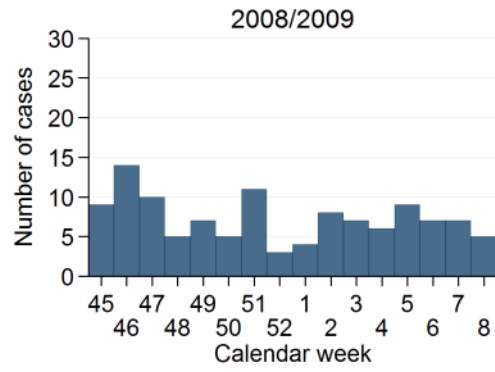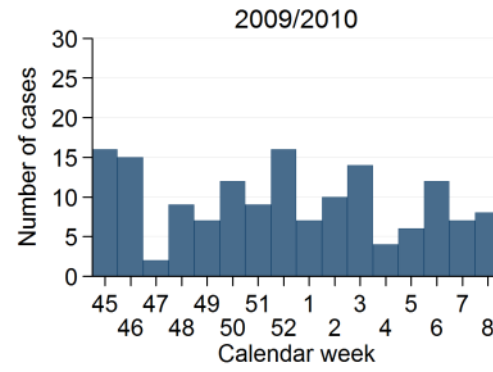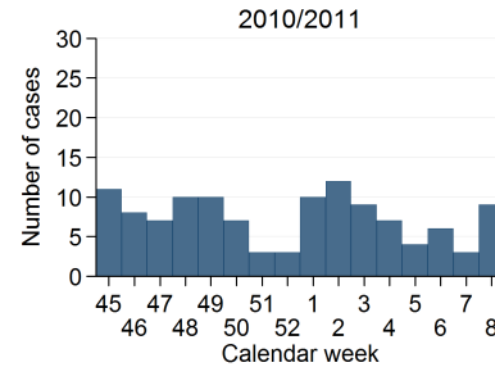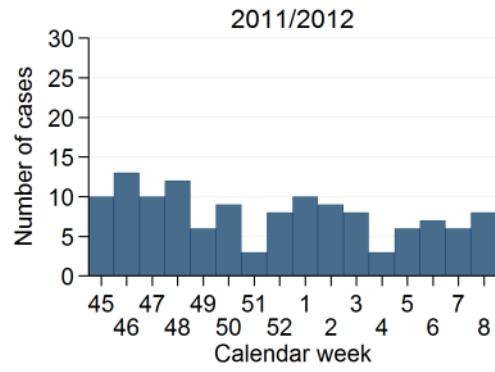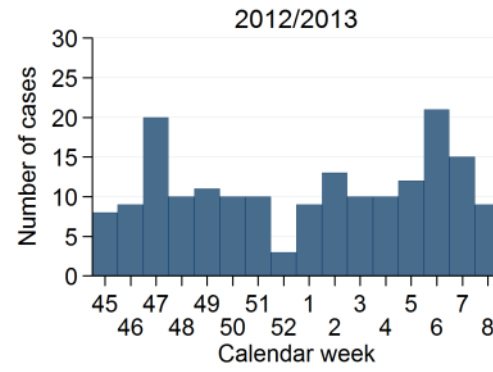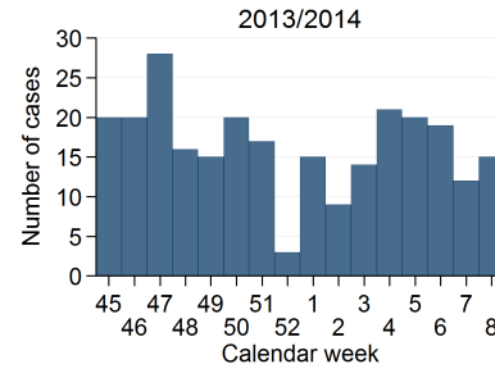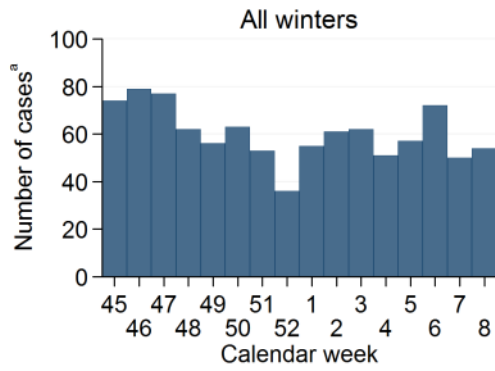

<sup>a</sup>Sum of weekly notifications from winter seasons 2008/2009 to 2013/2014

# Luxembourg

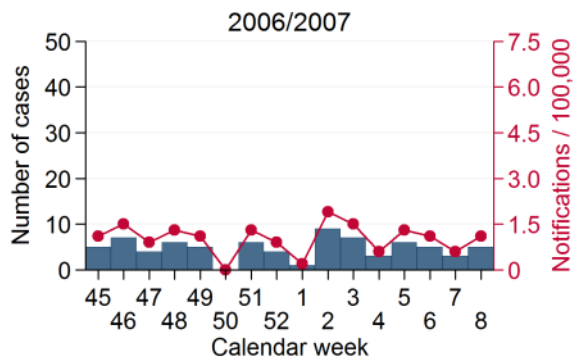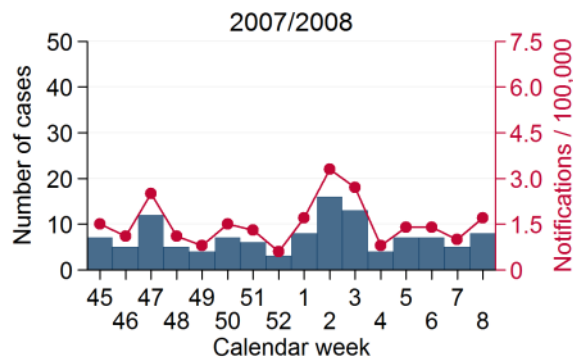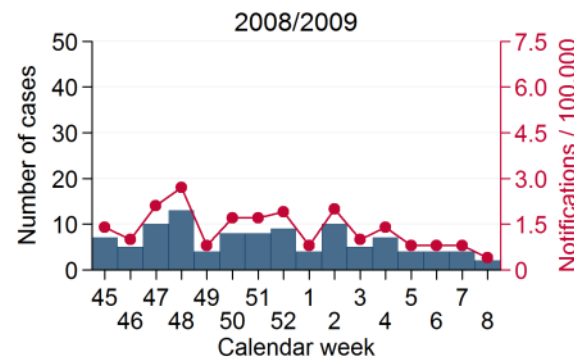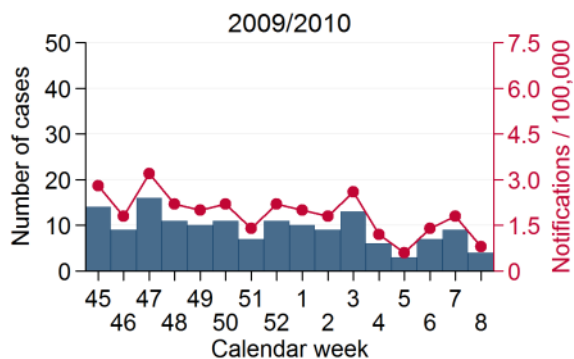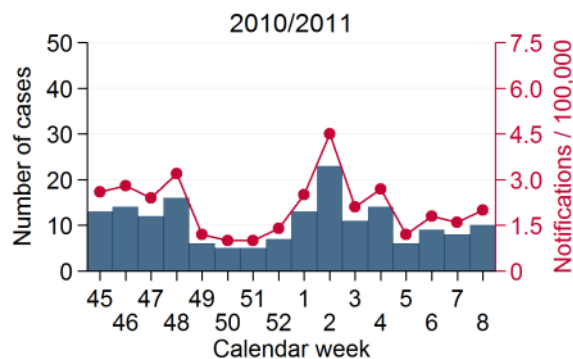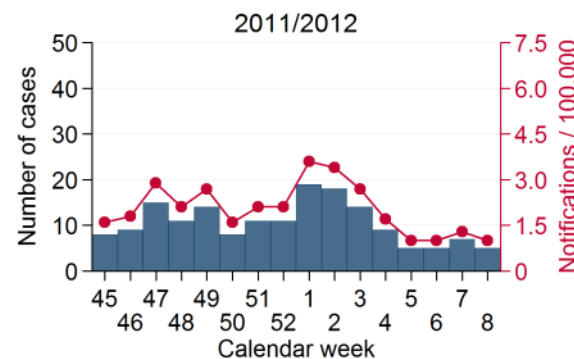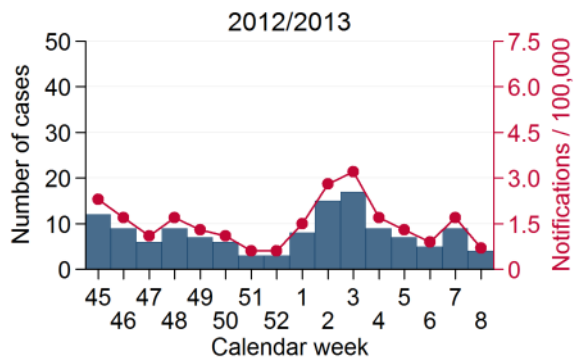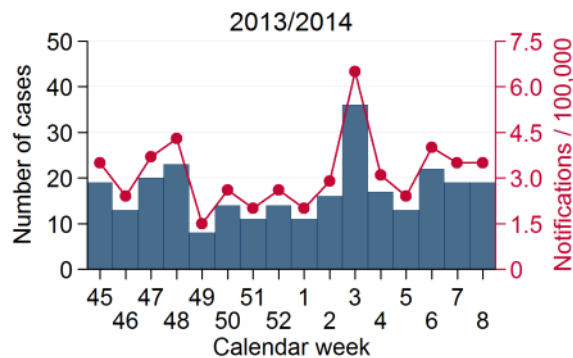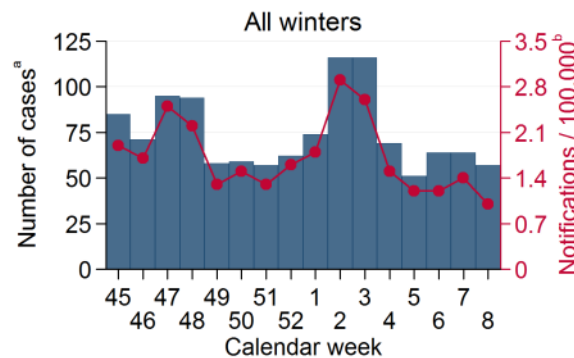

<sup>a</sup>Sum of weekly notifications from winter seasons 2006/2007 to 2013/2014

<sup>b</sup>Weekly notifications per 100,000 population = median of weekly notification rates from winter seasons 2006/2007 to 2013/2014

# The Netherlands

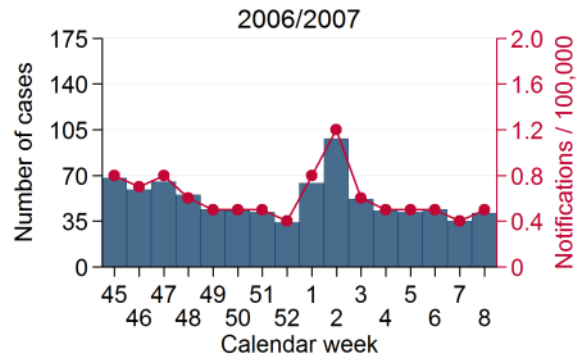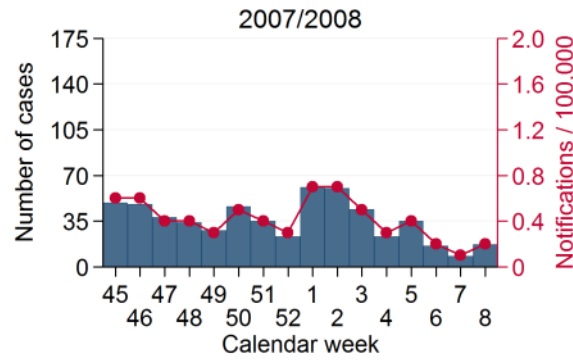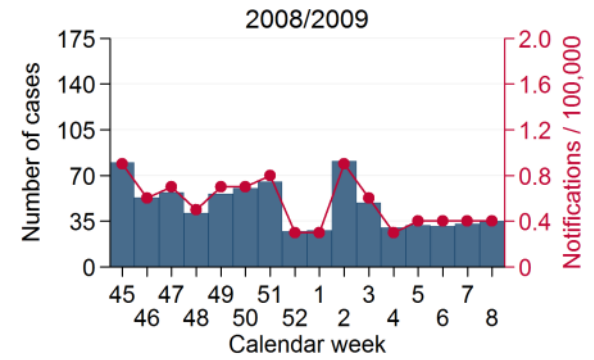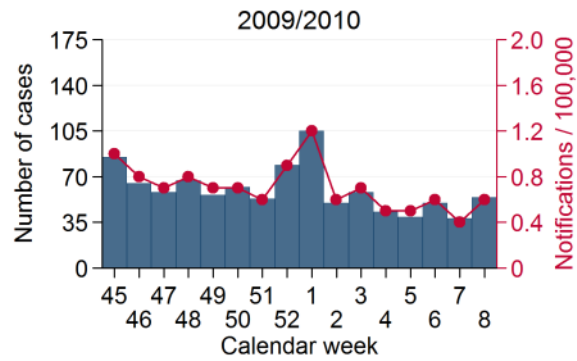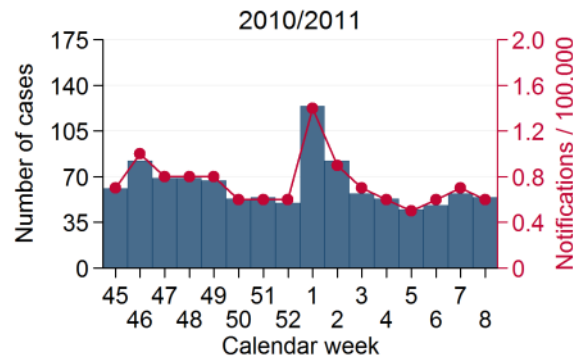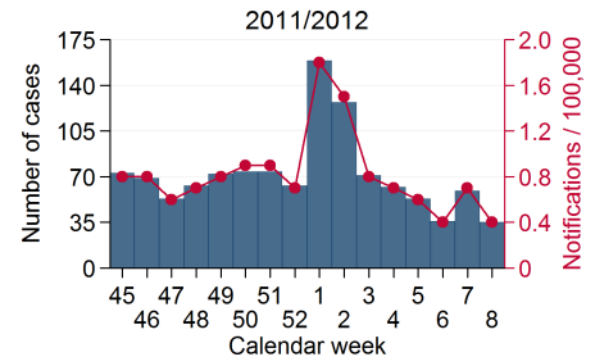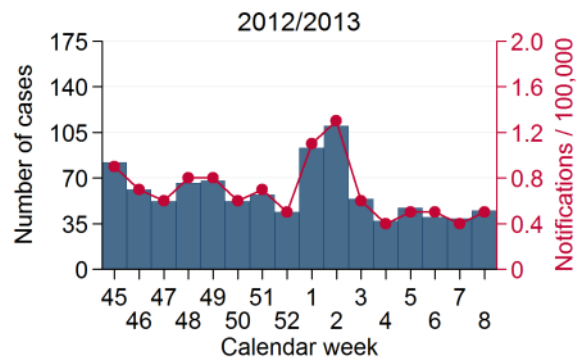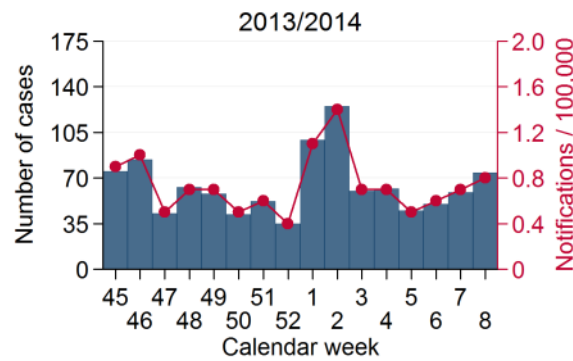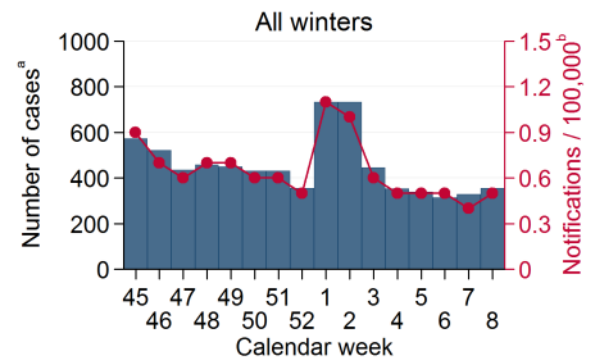

<sup>a</sup>Sum of weekly notifications from winter seasons 2006/2007 to 2013/2014

<sup>b</sup>Weekly notifications per 100,000 population = median of weekly notification rates from winter seasons 2006/2007 to 2013/2014

# Norway

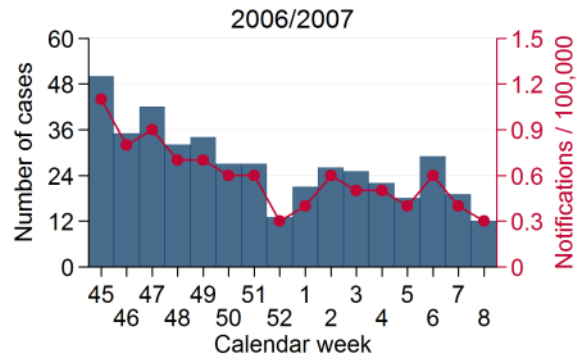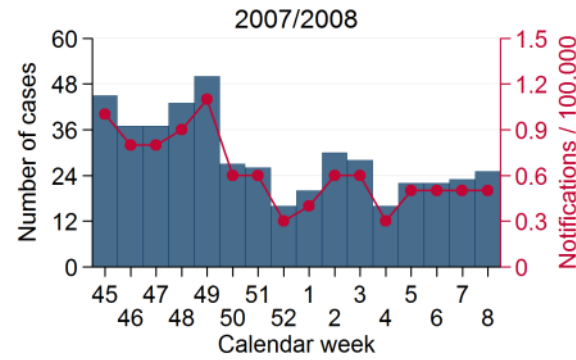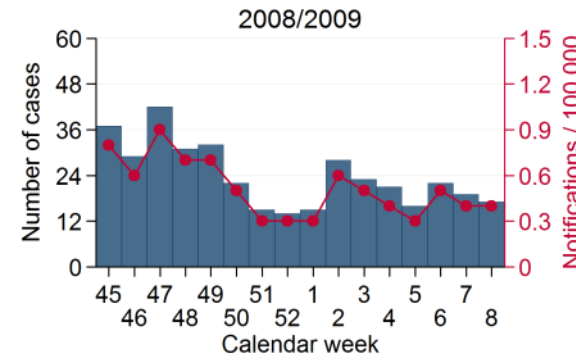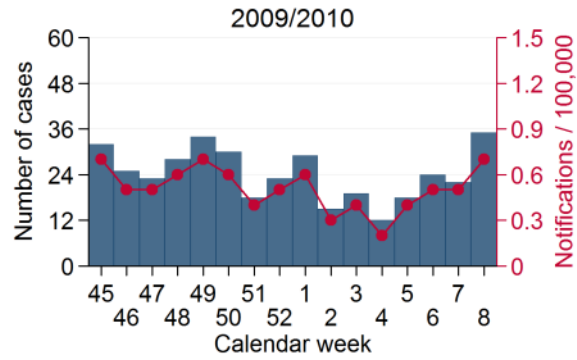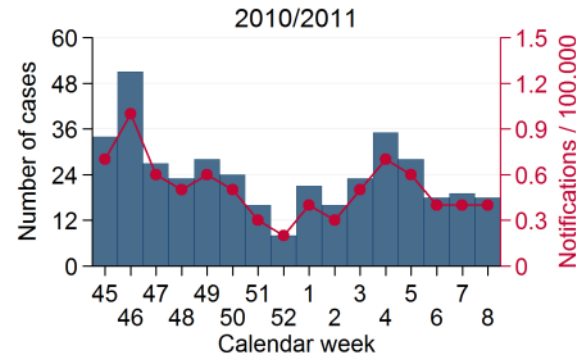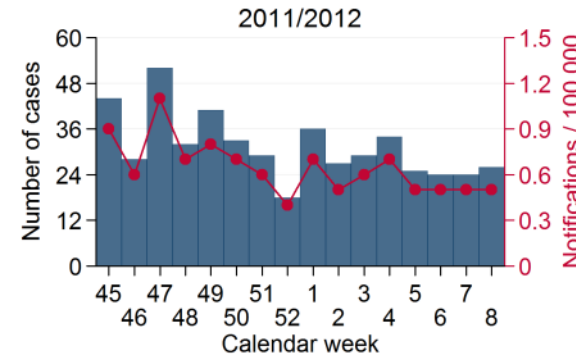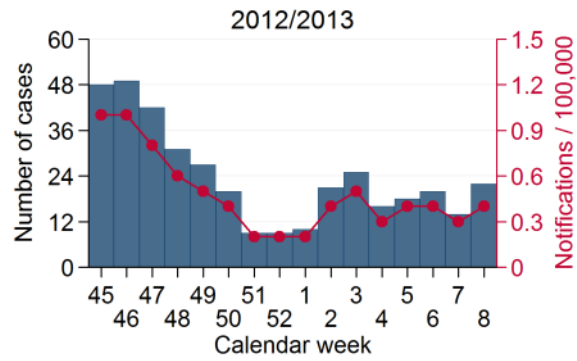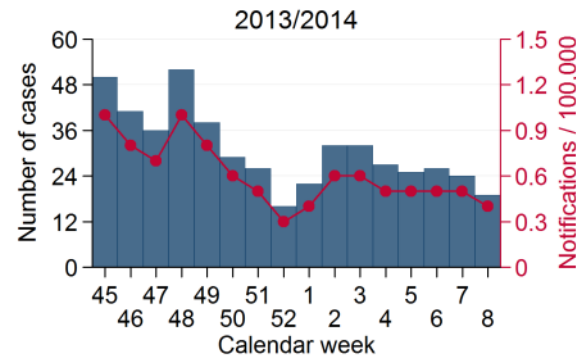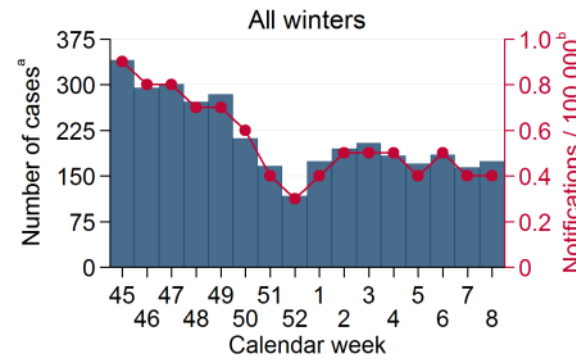

<sup>a</sup>Sum of weekly notifications from winter seasons 2006/2007 to 2013/2014

<sup>b</sup>Weekly notifications per 100,000 population = median of weekly notification rates from winter seasons 2006/2007 to 2013/2014

# Sweden

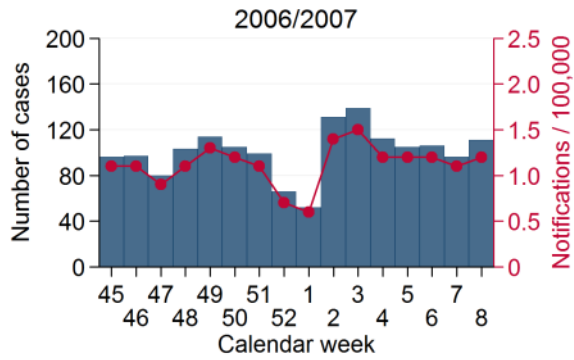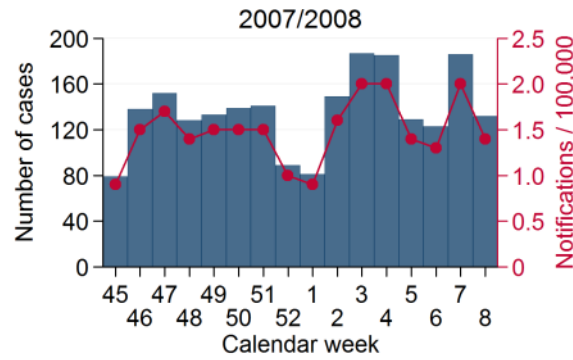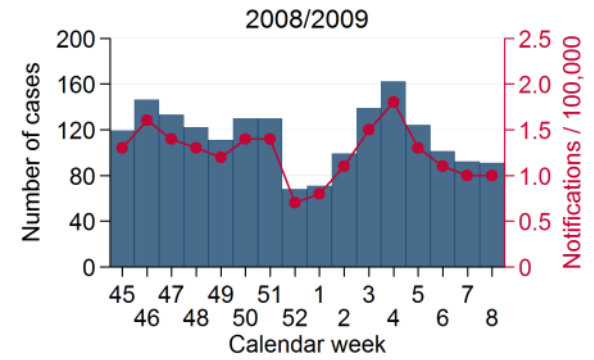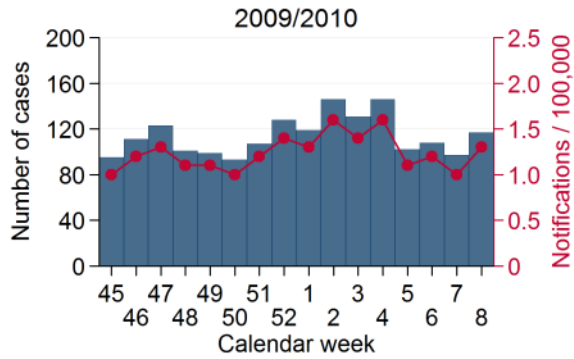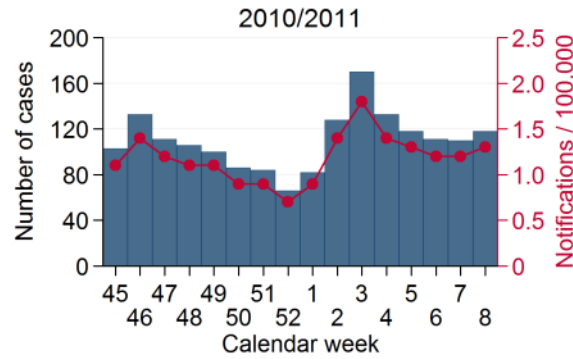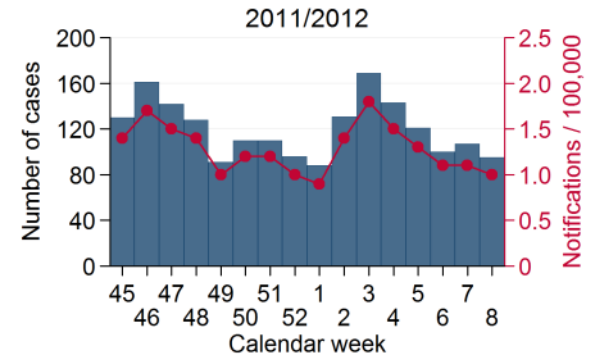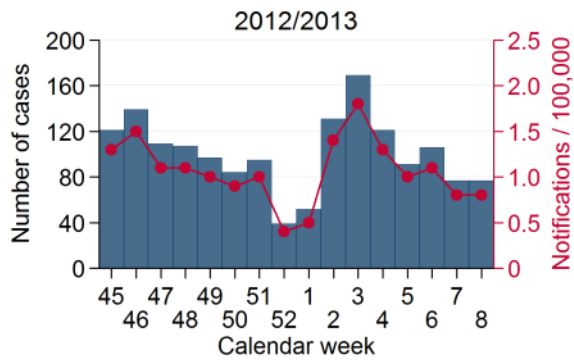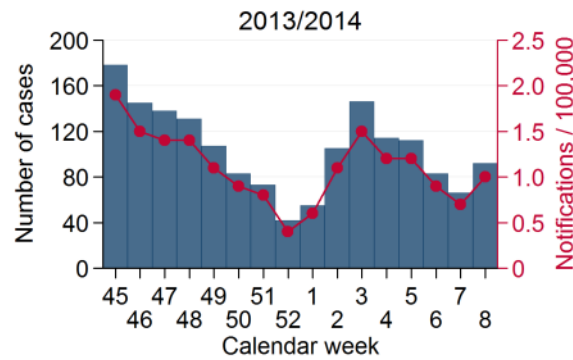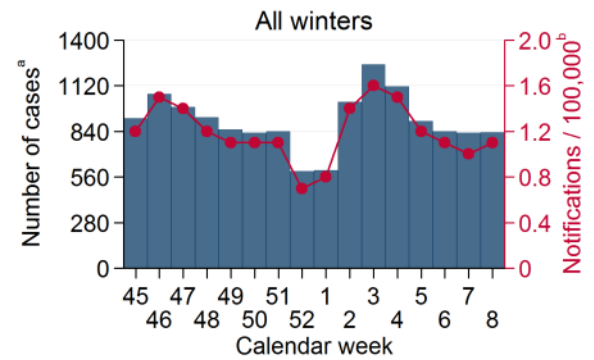

<sup>a</sup> Sum of weekly notifications from winter seasons 2006/2007 to 2013/2014

<sup>b</sup> Weekly notifications per 100,000 population = median of weekly notification rates from winter seasons 2006/2007 to 2013/2014

# Switzerland

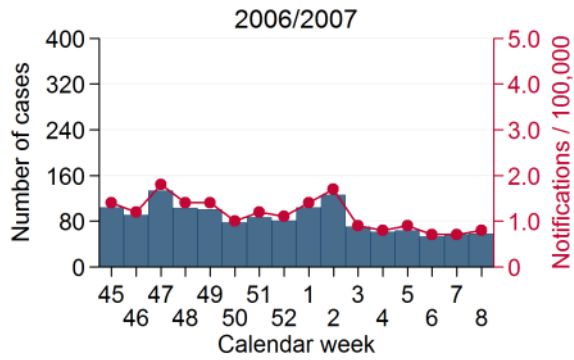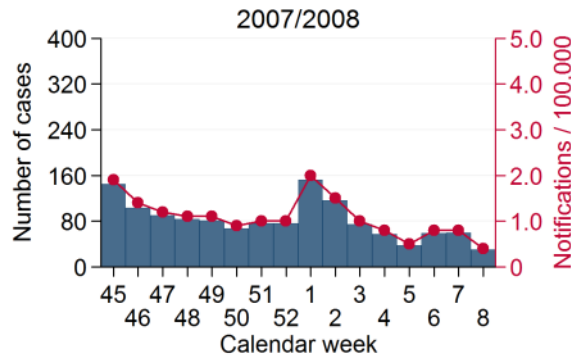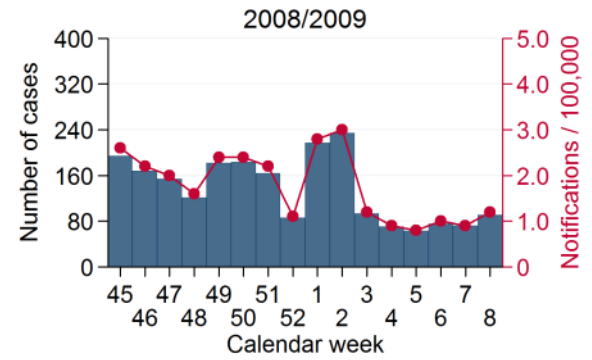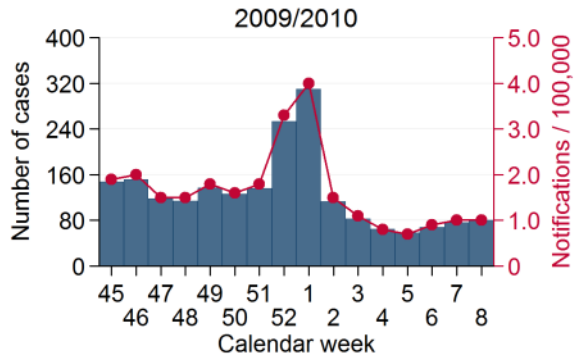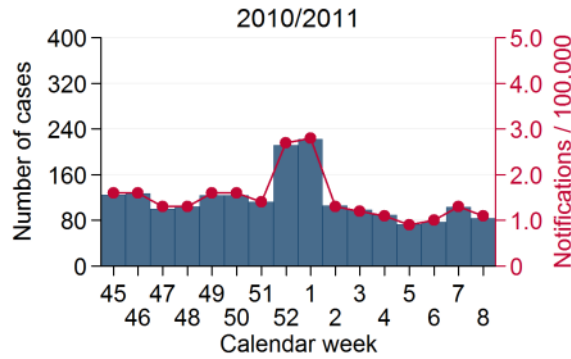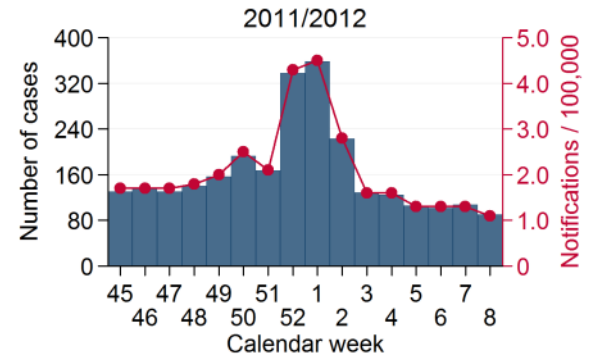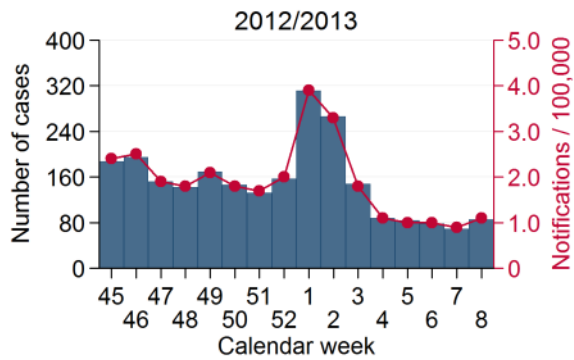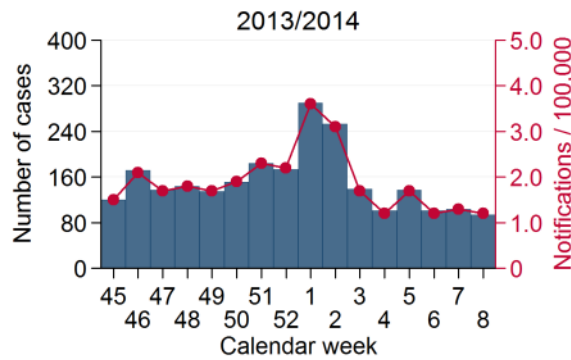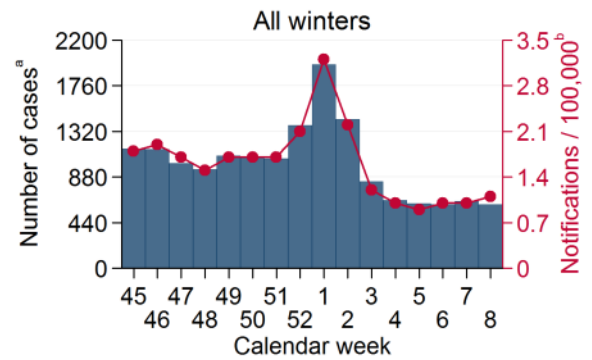

<sup>a</sup> Sum of weekly notifications from winter seasons 2006/2007 to 2013/2014

<sup>b</sup> Weekly notifications per 100,000 population = median of weekly notification rates from winter seasons 2006/2007 to 2013/2014



# The United Kingdom

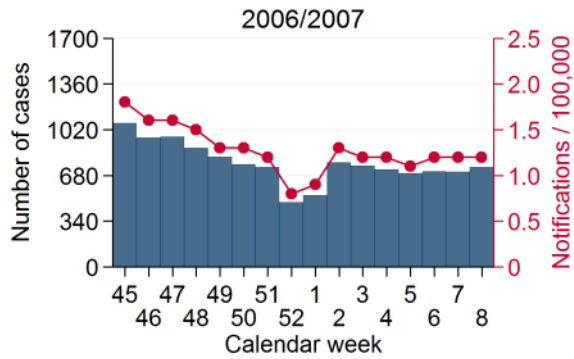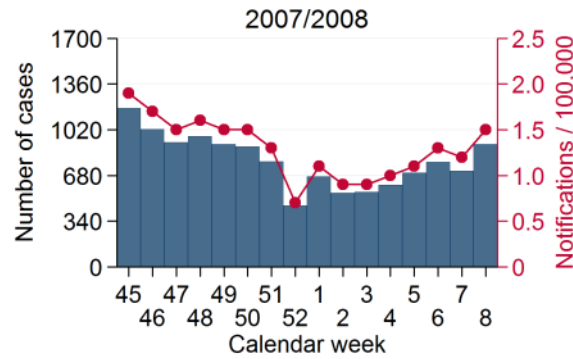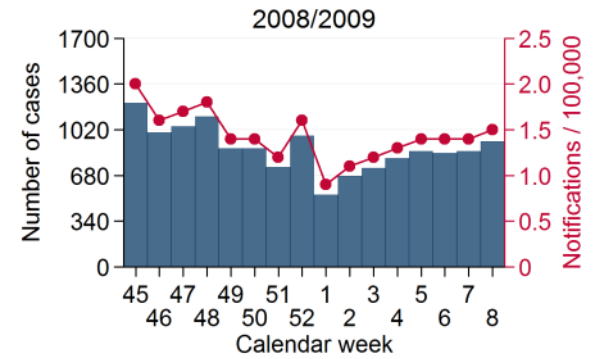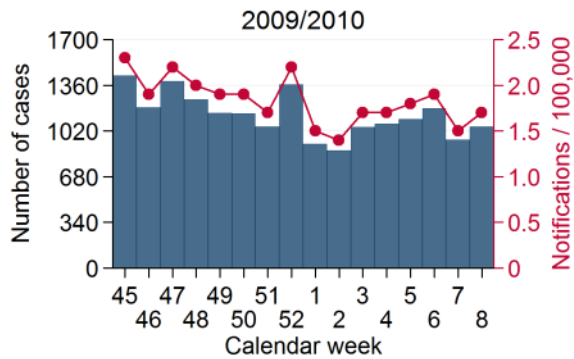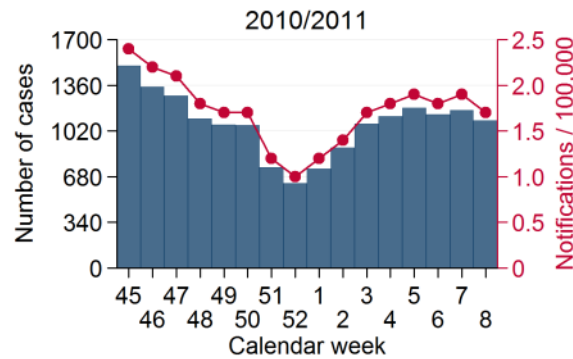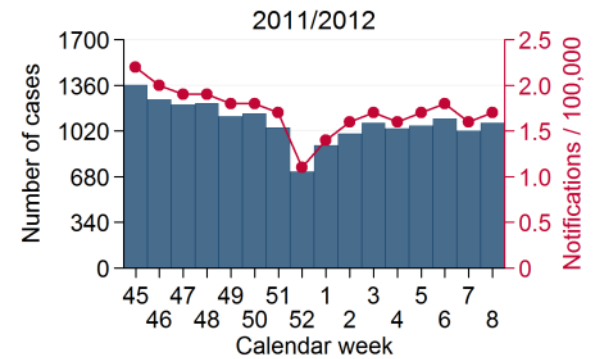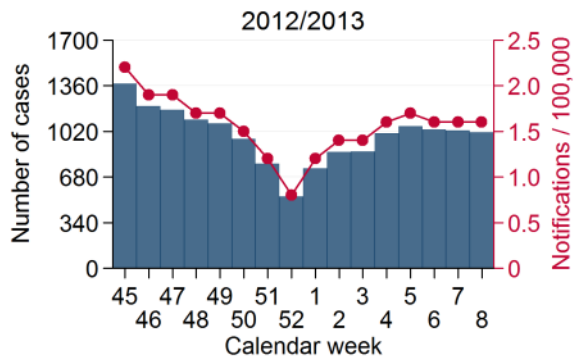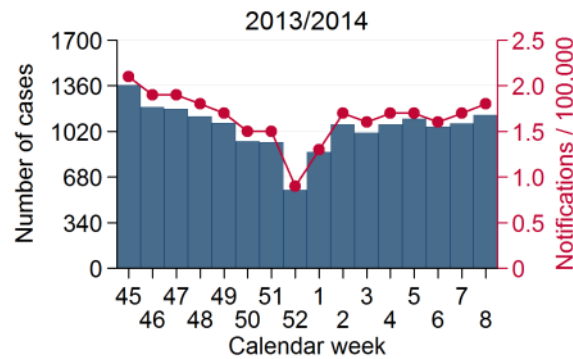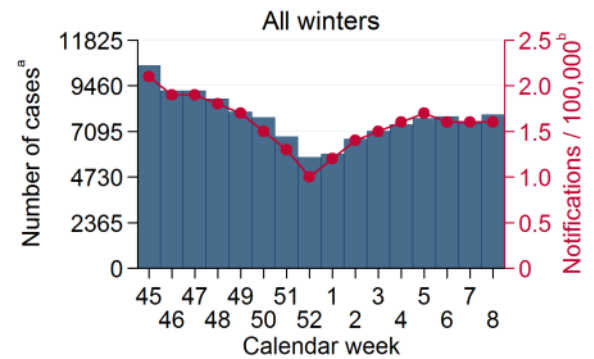

<sup>a</sup>Sum of weekly notifications from winter seasons 2006/2007 to 2013/2014

<sup>b</sup>Weekly notifications per 100,000 population = median of weekly notification rates from winter seasons 2006/2007 to 2013/2014
